# Supplementary material
Source: HighWire-hosted journal article supplement (https://www.ajnr.org/highwire/filestream/92662/field_highwire_adjunct_files/0/0014.pdf)

## **Supplemental Materials**

### Supplemental Methods 1. Six subgroups of aneurysm location

1) Extra-dural ring; cavernous internal carotid artery (ICA). 2) Around-dural ring; paraclinoid and ophthalmic ICA. 3) Intracranial distal ICA; P-com, anterior choroidal artery, distal ICA, ICA bifurcation. 4) Middle cerebral artery (MCA) major branch; MCA, MCA bifurcation, and M2. 5) Anterior cerebral artery (ACA) major branch; A-com, A1, and A2. 6) Posterior circulation: basilar tip and basilar artery (BA)- superior cerebellar artery (SCA) aneurysms

**Table S1. Diagnostic performance of CAD software and reader-average, with statistical comparison**

|                                   | <b>CAD software</b>    | <b>Human without CAD assistance</b> | <b>Human with CAD assistance</b> | <b>CAD vs. Human (without CAD assistance)</b> | <b>CAD vs. Human (with CAD assistance)</b> | <b>Human (without) vs. Human (with CAD assistance)</b> |
|-----------------------------------|------------------------|-------------------------------------|----------------------------------|-----------------------------------------------|--------------------------------------------|--------------------------------------------------------|
| Sensitivity % (95% CI)            | 74.8<br>(67.5, 82.1)   | 73.5<br>(69.8, 77.2)                | 86.5<br>(83.6, 89.4)             | 0.757                                         | <b>0.004</b>                               | <b>&lt;0.001</b>                                       |
| Specificity % (95% CI)            | 93.9<br>(90.6, 97.2)   | 94.8<br>(93.2, 96.3)                | 95.2<br>(93.7, 96.7)             | 0.636                                         | 0.497                                      | 0.729                                                  |
| Sensitivity per lesion % (95% CI) | 92.3<br>(88.1, 96.5)   | 78.4<br>(74.3, 82.5)                | 95<br>(92.8, 97.1)               | <b>&lt;0.001</b>                              | 0.095                                      | <b>&lt;0.001</b>                                       |
| False positive per case           | 0.12<br>(0.086, 0.169) | 0.045<br>(0.035, 0.059)             | 0.064<br>(0.049, 0.084)          | <b>&lt;0.001</b>                              | <b>&lt;0.001</b>                           | <b>0.017</b>                                           |

CAD: computer-assisted detection

**Table S2. Sensitivity per lesion of subgroups, with comparison between each occasion\***

| <b>Subgroup</b>                 | <b>CAD software</b>  | <b>Human without CAD assistance</b> | <b>Human with CAD assistance</b>    | <b>CAD vs. Human (without CAD assistance)</b> | <b>CAD vs. Human (with CAD assistance)</b> | <b>Human (without) vs. Human (with CAD assistance)</b> |
|---------------------------------|----------------------|-------------------------------------|-------------------------------------|-----------------------------------------------|--------------------------------------------|--------------------------------------------------------|
| <b>Diameter</b><br>% (95% CI)** |                      |                                     |                                     |                                               |                                            |                                                        |
| <3 mm                           | 84<br>(75.6, 92.3)   | 68.8<br>(62.2, 75.4)                | 91.4<br>(87.3, 95.4)                | <b>&lt;0.001</b>                              | <b>0.018</b>                               | <b>&lt;0.001</b>                                       |
| 3-5 mm                          | 100<br>(100, 100)    | 86.2<br>(82, 90.4)                  | 98.4<br>(96.7, 100)                 | <b>&lt;0.001</b>                              | <b>0.050</b>                               | <b>&lt;0.001</b>                                       |
| >5 mm                           | 100<br>(100, 100)    | 93.8<br>(87.6, 99.9)                | 97.9<br>(94, 101.8)                 | <b>0.046</b>                                  | 0.296                                      | 0.296                                                  |
| <b>Volume</b><br>% (95% CI)**   |                      |                                     |                                     |                                               |                                            |                                                        |
| <10 cc                          | 77.6<br>(66.4, 88.8) | 65.5<br>(58, 73)                    | 88.8<br>(83.7, 93.9)                | <b>0.014</b>                                  | <b>0.005</b>                               | <b>&lt;0.001</b>                                       |
| 10-20 cc                        | 100<br>(100, 100)    | 80.3<br>(74, 86.5)                  | 97.6<br>(95, 100)                   | <b>&lt;0.001</b>                              | 0.073                                      | <b>&lt;0.001</b>                                       |
| > 20cc                          | 100<br>(100, 100)    | 89.4<br>(85.1, 93.7)                | 98.7<br>(97.4, 100)                 | <b>&lt;0.001</b>                              | 0.067                                      | <b>&lt;0.001</b>                                       |
| <b>Location</b><br>% (95% CI)** |                      |                                     |                                     |                                               |                                            |                                                        |
| ACA major branch                | 60<br>(29.9, 90.1)   | 35<br>(8.7, 61.3)                   | 70<br>(44.4, 95.6)                  | 0.151                                         | 0.120                                      | 0.054                                                  |
| Around-dural ring               | 93.4<br>(88.7, 98.1) | 82.5<br>(78.5, 86.6)                | 96.9<br>(94.9, 99)                  | <b>&lt;0.001</b>                              | <b>0.035</b>                               | <b>&lt;0.001</b>                                       |
| Extra-dural ring                | 83.3<br>(62.2, 100)  | 75<br>(60.9, 89.1)                  | 93.8<br>(85.3, 100)                 | 0.401                                         | 0.130                                      | <b>0.005</b>                                           |
| Intracranial Distal ICA         | 100<br>(100, 100)    | 70.7<br>(60.1, 81.2)                | 92.4<br>(86.9, 97.9)                | <b>&lt;0.001</b>                              | <b>0.007</b>                               | <b>&lt;0.001</b>                                       |
| MCA major branch                | 94.7<br>(84.7, 100)  | 78.9<br>(65.3, 92.6)                | 96.1<br>(90.7, 100)                 | <b>0.017</b>                                  | 0.828                                      | <b>0.006</b>                                           |
| Posterior circulation           | 75<br>(32.6, 100)    | 75<br>(57.7, 92.3)                  | 87.5<br>(57.7, 92.3)<br>(66.3, 100) | >.999                                         | 0.248                                      | <b>0.046</b>                                           |

CAD, computer-assisted detection; ACA, anterior cerebral artery; ICA, internal carotid artery; MCA, middle cerebral artery

\*P-value for interaction between diameter, volume, and location subgroups and occasion (CAD, human (with), human (without)) were <0.0001, <0.0001, and 0.0325, respectively.

\*\*95% CI was estimated by logistic regression with GEE.

**Table S3. Reader-individual comparisons in each subgroup**

| Subgroup         | Reader      | Before                                                              | After        | Before                            | After             | Before vs. After  | P-value |
|------------------|-------------|---------------------------------------------------------------------|--------------|-----------------------------------|-------------------|-------------------|---------|
| <b>Diameter</b>  |             | Sensitivity<br>(number of detected lesions/number of total lesions) |              | Sensitivity<br>(estimated 95% CI) |                   |                   |         |
| <3 mm            | NR          | 46.9 (38/81)                                                        | 82.7 (67/81) | 46.9 (36.3, 57.5)                 | 82.7 (73.8, 91.6) | 35.8 (23.6, 48)   | <0.0001 |
| <3 mm            | NS          | 75.3 (61/81)                                                        | 93.8 (76/81) | 75.3 (65.1, 85.5)                 | 93.8 (88.7, 98.9) | 18.5 (7.4, 29.6)  | 0.0010  |
| <3 mm            | Radiologist | 84 (68/81)                                                          | 95.1 (77/81) | 84 (75.3, 92.6)                   | 95.1 (90.5, 99.6) | 11.1 (2.4, 19.9)  | 0.0129  |
| <3 mm            | Resident    | 69.1 (56/81)                                                        | 93.8 (76/81) | 69.1 (59.1, 79.1)                 | 93.8 (88.7, 98.9) | 24.7 (15.4, 34)   | <0.0001 |
| 3-5 mm           | NR          | 68.4 (52/76)                                                        | 100 (76/76)  | 68.4 (58.3, 78.5)                 | 100 (NaN, NaN)    | 31.6 (21.5, 41.7) | <0.0001 |
| 3-5 mm           | NS          | 89.5 (68/76)                                                        | 98.7 (75/76) | 89.5 (82.5, 96.5)                 | 98.7 (96.1, 100)  | 9.2 (2.6, 15.8)   | 0.0061  |
| 3-5 mm           | Radiologist | 96.1 (73/76)                                                        | 96.1 (73/76) | 96.1 (91.7, 100)                  | 96.1 (91.8, 100)  | 0 (-5.2, 5.2)     | 1.0000  |
| 3-5 mm           | Resident    | 90.8 (69/76)                                                        | 98.7 (75/76) | 90.8 (84.4, 97.2)                 | 98.7 (96.1, 101)  | 7.9 (1.9, 13.9)   | 0.0094  |
| >5 mm            | NR          | 100 (12/12)                                                         | 100 (12/12)  | 100 (NaN, NaN)                    | 100 (NaN, NaN)    | 0 (NaN, NaN)      | NA      |
| >5 mm            | NS          | 83.3 (10/12)                                                        | 100 (12/12)  | 83.3 (62.2, 100)                  | 100 (NaN, NaN)    | 16.7 (-4.4, 37.8) | 0.1213  |
| >5 mm            | Radiologist | 100 (12/12)                                                         | 91.7 (11/12) | 100 (NaN, NaN)                    | 91.7 (76, 100)    | -8.3 (-24, 7.3)   | 0.2963  |
| >5 mm            | Resident    | 91.7 (11/12)                                                        | 100 (12/12)  | 91.7 (76, 100)                    | 100 (NaN, NaN)    | 8.3 (-7.3, 24)    | 0.2963  |
| <b>Volume</b>    |             |                                                                     |              |                                   |                   |                   |         |
| <10 cc           | NR          | 39.7 (23/58)                                                        | 77.6 (45/58) | 39.7 (27.7, 51.6)                 | 77.6 (66.2, 89)   | 37.9 (22.9, 52.9) | <0.0001 |
| <10 cc           | NS          | 72.4 (42/58)                                                        | 91.4 (53/58) | 72.4 (60, 84.8)                   | 91.4 (84.4, 98.3) | 19 (5.4, 32.6)    | 0.0063  |
| <10 cc           | Radiologist | 81 (47/58)                                                          | 93.1 (54/58) | 81 (70.2, 91.8)                   | 93.1 (86.9, 99.3) | 12.1 (1.3, 22.9)  | 0.0287  |
| <10 cc           | Resident    | 69 (40/58)                                                          | 93.1 (54/58) | 69 (56.9, 81.1)                   | 93.1 (86.6, 99.6) | 24.1 (12.7, 35.6) | <0.0001 |
| 10-20 cc         | NR          | 63.5 (33/52)                                                        | 98.1 (51/52) | 63.5 (50.9, 76)                   | 98.1 (94.4, 100)  | 34.6 (21.8, 47.4) | <0.0001 |
| 10-20 cc         | NS          | 80.8 (42/52)                                                        | 98.1 (51/52) | 80.8 (70.5, 91.1)                 | 98.1 (94.4, 100)  | 17.3 (7.2, 27.4)  | 0.0008  |
| 10-20 cc         | Radiologist | 94.2 (49/52)                                                        | 98.1 (51/52) | 94.2 (88, 100)                    | 98.1 (94.4, 100)  | 3.8 (-3.6, 11.3)  | 0.3130  |
| 10-20 cc         | Resident    | 82.7 (43/52)                                                        | 96.2 (50/52) | 82.7 (71.5, 93.9)                 | 96.2 (91, 100)    | 13.5 (4.3, 22.6)  | 0.0038  |
| >20 cc           | NR          | 78 (46/59)                                                          | 100 (59/59)  | 78 (67.5, 88.4)                   | 100 (NaN, NaN)    | 22 (11.6, 32.5)   | <0.0001 |
| >20 cc           | NS          | 93.2 (55/59)                                                        | 100 (59/59)  | 93.2 (86.7, 99.7)                 | 100 (NaN, NaN)    | 6.8 (0.3, 13.3)   | 0.0405  |
| >20 cc           | Radiologist | 96.6 (57/59)                                                        | 94.9 (56/59) | 96.6 (92, 100)                    | 94.9 (89.5, 100)  | -1.7 (-7.4, 4)    | 0.5607  |
| >20 cc           | Resident    | 89.8 (53/59)                                                        | 100 (59/59)  | 89.8 (82.4, 97.2)                 | 100 (NaN, NaN)    | 10.2 (2.8, 17.6)  | 0.0071  |
| <b>Location</b>  |             |                                                                     |              |                                   |                   |                   |         |
| ACA major branch | NR          | 20 (1/5)                                                            | 60 (3/5)     | 20 (0, 55.1)                      | 60 (17.1, 100)    | 40 (-2.9, 82.9)   | 0.0679  |
| ACA major branch | NS          | 60 (3/5)                                                            | 80 (4/5)     | 60 (17.1, 100)                    | 80 (44.9, 100)    | 20 (-45.6, 85.6)  | 0.5501  |
| ACA major branch | Radiologist | 60 (3/5)                                                            | 100 (5/5)    | 60 (17.1, 100)                    | 100 (NaN, NaN)    | 40 (-2.9, 82.9)   | 0.0679  |

|                         |             |               |                |                   |                   |                   |         |
|-------------------------|-------------|---------------|----------------|-------------------|-------------------|-------------------|---------|
| ACA major branch        | Resident    | 0 (0/5)       | 40 (2/5)       | 0 (NaN, NaN)      | 40 (0, 82.9)      | 40 (-2.9, 82.9)   | 0.0679  |
| Around-dural ring       | NR          | 63.2 (67/106) | 92.5 (98/106)  | 63.2 (54.1, 72.3) | 92.5 (87.5, 97.5) | 29.2 (19.9, 38.6) | <0.0001 |
| Around-dural ring       | NS          | 87.7 (93/106) | 98.1 (104/106) | 87.7 (81.2, 94.3) | 98.1 (95.5, 100)  | 10.4 (3.6, 17.1)  | 0.0026  |
| Around-dural ring       | Radiologist | 91.5 (97/106) | 98.1 (104/106) | 91.5 (86.2, 96.8) | 98.1 (95.5, 100)  | 6.6 (1.9, 11.3)   | 0.0059  |
| Around-dural ring       | Resident    | 87.7 (93/106) | 99.1 (105/106) | 87.7 (81.6, 93.9) | 99.1 (97.2, 100)  | 11.3 (5.4, 17.3)  | 0.0002  |
| Extra-dural ring        | NR          | 66.7 (8/12)   | 83.3 (10/12)   | 66.7 (40, 93.3)   | 83.3 (62.2, 100)  | 16.7 (-4.4, 37.8) | 0.1213  |
| Extra-dural ring        | NS          | 58.3 (7/12)   | 91.7 (11/12)   | 58.3 (30.4, 86.2) | 91.7 (76, 100)    | 33.3 (6.7, 60)    | 0.0143  |
| Extra-dural ring        | Radiologist | 91.7 (11/12)  | 100 (12/12)    | 91.7 (76, 100)    | 100 (NaN, NaN)    | 8.3 (-7.3, 24)    | 0.2963  |
| Extra-dural ring        | Resident    | 83.3 (10/12)  | 100 (12/12)    | 83.3 (62.2, 100)  | 100 (NaN, NaN)    | 16.7 (-4.4, 37.8) | 0.1213  |
| Intracranial distal ICA | NR          | 47.8 (11/23)  | 100 (23/23)    | 47.8 (27.3, 68.3) | 100 (NaN, NaN)    | 52.2 (31.7, 72.7) | <0.0001 |
| Intracranial distal ICA | NS          | 78.3 (18/23)  | 91.3 (21/23)   | 78.3 (61, 95.5)   | 91.3 (79.7, 100)  | 13 (-5.4, 31.5)   | 0.1654  |
| Intracranial distal ICA | Radiologist | 91.3 (21/23)  | 82.6 (19/23)   | 91.3 (79.7, 100)  | 82.6 (67.7, 97.6) | -8.7 (-25, 7.7)   | 0.2973  |
| Intracranial distal ICA | Resident    | 65.2 (15/23)  | 95.7 (22/23)   | 65.2 (44.9, 85.6) | 95.7 (87.3, 100)  | 30.4 (10.9, 49.9) | 0.0022  |
| MCA major branch        | NR          | 63.2 (12/19)  | 94.7 (18/19)   | 63.2 (40.8, 85.5) | 94.7 (84.7, 100)  | 31.6 (10.2, 53)   | 0.0038  |
| MCA major branch        | NS          | 78.9 (15/19)  | 100 (19/19)    | 78.9 (60.4, 97.5) | 100 (NaN, NaN)    | 21.1 (2.5, 39.6)  | 0.0264  |
| MCA major branch        | Radiologist | 89.5 (17/19)  | 94.7 (18/19)   | 89.5 (75.6, 100)  | 94.7 (85.2, 100)  | 5.3 (-12.8, 23.3) | 0.5674  |
| MCA major branch        | Resident    | 84.2 (16/19)  | 94.7 (18/19)   | 84.2 (67.7, 100)  | 94.7 (84.7, 100)  | 10.5 (-3.4, 24.4) | 0.1373  |
| Posterior circulation   | NR          | 75 (3/4)      | 75 (3/4)       | 75 (32.6, 100)    | 75 (32.6, 100)    | 0 (NaN, NaN)      | NA      |
| Posterior circulation   | NS          | 75 (3/4)      | 100 (4/4)      | 75 (32.6, 100)    | 100 (NaN, NaN)    | 25 (-17.4, 67.4)  | 0.2482  |
| Posterior circulation   | Radiologist | 100 (4/4)     | 75 (3/4)       | 100 (NaN, NaN)    | 75 (32.6, 100)    | -25 (-67.4, 17.4) | 0.2482  |
| Posterior circulation   | Resident    | 50 (2/4)      | 100 (4/4)      | 50 (1, 99)        | 100 (NaN, NaN)    | 50 (1, 99)        | 0.0455  |

NR: neurologist, NS: neurosurgeon, ACA: anterior cerebral artery, ICA: internal carotid artery, MCA: middle cerebral artery

**Table S4. Detection results for every lesion of human readers and comparison with the detection result of CAD software**

| <b>Group</b>                   | <b>Both detected<br/>(percentage)</b> | <b>Both missed<br/>(percentage)</b> | <b>AI detected but<br/>humans ignored<br/>(percentage)</b> | <b>AI missed but<br/>humans detected<br/>(percentage)</b> |
|--------------------------------|---------------------------------------|-------------------------------------|------------------------------------------------------------|-----------------------------------------------------------|
| <b>All (%)</b>                 | 610/676 (90.2)                        | 20/676 (3)                          | 14/676 (2.1)                                               | 32/676 (4.7)                                              |
| <b>Diameter</b>                |                                       |                                     |                                                            |                                                           |
| <b>&lt;3 mm</b>                | 264/324 (81.5)                        | 20/324 (6.2)                        | 8/324 (2.5)                                                | 32/324 (9.9)                                              |
| <b>3-5 mm</b>                  | 299/304 (98.4)                        | 0/304 (0)                           | 5/304 (1.6)                                                | 0/304 (0)                                                 |
| <b>&gt;5 mm</b>                | 47/48 (97.9)                          | 0/48 (0)                            | 1/48 (2.1)                                                 | 0/48 (0)                                                  |
| <b>Volume</b>                  |                                       |                                     |                                                            |                                                           |
| <b>&lt;10 cc</b>               | 174/232 (75)                          | 20/232 (8.6)                        | 6/232 (2.6)                                                | 32/232 (13.8)                                             |
| <b>10-20 cc</b>                | 203/208 (97.6)                        | 0/208 (0)                           | 5/208 (2.4)                                                | 0/208 (0)                                                 |
| <b>&gt;20 cc</b>               | 233/236 (98.7)                        | 0/236 (0)                           | 3/236 (1.3)                                                | 0/236 (0)                                                 |
| <b>Location</b>                |                                       |                                     |                                                            |                                                           |
| <b>ACA major branch</b>        | 11/20 (55)                            | 5/20 (25)                           | 1/20 (5)                                                   | 3/20 (15)                                                 |
| <b>Around-dural ring</b>       | 393/424 (92.7)                        | 10/424 (2.4)                        | 3/424 (0.7)                                                | 18/424 (4.2)                                              |
| <b>Extra-dural ring</b>        | 40/48 (83.3)                          | 3/48 (6.2)                          | 0/48 (0)                                                   | 5/48 (10.4)                                               |
| <b>Intracranial distal ICA</b> | 85/92 (92.4)                          | 0/92 (0)                            | 7/92 (7.6)                                                 | 0/92 (0)                                                  |
| <b>MCA major branch</b>        | 69/76 (90.8)                          | 0/76 (0)                            | 3/76 (3.9)                                                 | 4/76 (5.3)                                                |
| <b>Posterior circulation</b>   | 12/16 (75)                            | 2/16 (12.5)                         | 0/16 (0)                                                   | 2/16 (12.5)                                               |

ACA: anterior cerebral artery, ICA: internal carotid artery, MCA: middle cerebral artery

**Table S5. Reader-individual comparisons between CAD software for detection results of every lesion**

| <b>Group</b>                   | <b>Reader</b>      | <b>Both detected (percentage)</b> | <b>Both missed (percentage)</b> | <b>AI detected but humans ignored (percentage)</b> | <b>AI missed but humans detected (percentage)</b> |
|--------------------------------|--------------------|-----------------------------------|---------------------------------|----------------------------------------------------|---------------------------------------------------|
| <b>All (%)</b>                 | <b>NR</b>          | 154/169 (91.1)                    | 12/169 (7.1)                    | 2/169 (1.2)                                        | 1/169 (0.6)                                       |
|                                | <b>NS</b>          | 153/169 (90.5)                    | 3/169 (1.8)                     | 3/169 (1.8)                                        | 10/169 (5.9)                                      |
|                                | <b>Radiologist</b> | 150/169 (88.8)                    | 2/169 (1.2)                     | 6/169 (3.6)                                        | 11/169 (6.5)                                      |
|                                | <b>Resident</b>    | 153/169 (90.5)                    | 3/169 (1.8)                     | 3/169 (1.8)                                        | 10/169 (5.9)                                      |
| <b>Diameter</b>                |                    |                                   |                                 |                                                    |                                                   |
| <b>&lt;3 mm</b>                | <b>NR</b>          | 66/81 (81.5)                      | 12/81 (14.8)                    | 2/81 (2.5)                                         | 1/81 (1.2)                                        |
| <b>3-5 mm</b>                  | <b>NR</b>          | 76/76 (100)                       | 0/76 (0)                        | 0/76 (0)                                           | 0/76 (0)                                          |
| <b>&gt;5 mm</b>                | <b>NR</b>          | 12/12 (100)                       | 0/12 (0)                        | 0/12 (0)                                           | 0/12 (0)                                          |
| <b>&lt;3 mm</b>                | <b>NS</b>          | 66/81 (81.5)                      | 3/81 (3.7)                      | 2/81 (2.5)                                         | 10/81 (12.3)                                      |
| <b>3-5 mm</b>                  | <b>NS</b>          | 75/76 (98.7)                      | 0/76 (0)                        | 1/76 (1.3)                                         | 0/76 (0)                                          |
| <b>&gt;5 mm</b>                | <b>NS</b>          | 12/12 (100)                       | 0/12 (0)                        | 0/12 (0)                                           | 0/12 (0)                                          |
| <b>&lt;3 mm</b>                | <b>Radiologist</b> | 66/81 (81.5)                      | 2/81 (2.5)                      | 2/81 (2.5)                                         | 11/81 (13.6)                                      |
| <b>3-5 mm</b>                  | <b>Radiologist</b> | 73/76 (96.1)                      | 0/76 (0)                        | 3/76 (3.9)                                         | 0/76 (0)                                          |
| <b>&gt;5 mm</b>                | <b>Radiologist</b> | 11/12 (91.7)                      | 0/12 (0)                        | 1/12 (8.3)                                         | 0/12 (0)                                          |
| <b>&lt;3 mm</b>                | <b>Resident</b>    | 66/81 (81.5)                      | 3/81 (3.7)                      | 2/81 (2.5)                                         | 10/81 (12.3)                                      |
| <b>3-5 mm</b>                  | <b>Resident</b>    | 75/76 (98.7)                      | 0/76 (0)                        | 1/76 (1.3)                                         | 0/76 (0)                                          |
| <b>&gt;5 mm</b>                | <b>Resident</b>    | 12/12 (100)                       | 0/12 (0)                        | 0/12 (0)                                           | 0/12 (0)                                          |
| <b>Volume</b>                  |                    |                                   |                                 |                                                    |                                                   |
| <b>&lt;10 cc</b>               | <b>NR</b>          | 44/58 (75.9)                      | 12/58 (20.7)                    | 1/58 (1.7)                                         | 1/58 (1.7)                                        |
| <b>10-20 cc</b>                | <b>NR</b>          | 51/52 (98.1)                      | 0/52 (0)                        | 1/52 (1.9)                                         | 0/52 (0)                                          |
| <b>&gt;20 cc</b>               | <b>NR</b>          | 59/59 (100)                       | 0/59 (0)                        | 0/59 (0)                                           | 0/59 (0)                                          |
| <b>&lt;10 cc</b>               | <b>NS</b>          | 43/58 (74.1)                      | 3/58 (5.2)                      | 2/58 (3.4)                                         | 10/58 (17.2)                                      |
| <b>10-20 cc</b>                | <b>NS</b>          | 51/52 (98.1)                      | 0/52 (0)                        | 1/52 (1.9)                                         | 0/52 (0)                                          |
| <b>&gt; 20 cc</b>              | <b>NS</b>          | 59/59 (100)                       | 0/59 (0)                        | 0/59 (0)                                           | 0/59 (0)                                          |
| <b>&lt;10 cc</b>               | <b>Radiologist</b> | 43/58 (74.1)                      | 2/58 (3.4)                      | 2/58 (3.4)                                         | 11/58 (19)                                        |
| <b>10-20 cc</b>                | <b>Radiologist</b> | 51/52 (98.1)                      | 0/52 (0)                        | 1/52 (1.9)                                         | 0/52 (0)                                          |
| <b>&gt;20 cc</b>               | <b>Radiologist</b> | 56/59 (94.9)                      | 0/59 (0)                        | 3/59 (5.1)                                         | 0/59 (0)                                          |
| <b>&lt;10 cc</b>               | <b>Resident</b>    | 44/58 (75.9)                      | 3/58 (5.2)                      | 1/58 (1.7)                                         | 10/58 (17.2)                                      |
| <b>10-20 cc</b>                | <b>Resident</b>    | 50/52 (96.2)                      | 0/52 (0)                        | 2/52 (3.8)                                         | 0/52 (0)                                          |
| <b>&gt;20 cc</b>               | <b>Resident</b>    | 59/59 (100)                       | 0/59 (0)                        | 0/59 (0)                                           | 0/59 (0)                                          |
| <b>Location</b>                |                    |                                   |                                 |                                                    |                                                   |
| <b>ACA major branch</b>        | <b>NR</b>          | 3/5 (60)                          | 2/5 (40)                        | 0/5 (0)                                            | 0/5 (0)                                           |
| <b>Around-dural ring</b>       | <b>NR</b>          | 98/106 (92.5)                     | 7/106 (6.6)                     | 1/106 (0.9)                                        | 0/106 (0)                                         |
| <b>Extra-dural ring</b>        | <b>NR</b>          | 10/12 (83.3)                      | 2/12 (16.7)                     | 0/12 (0)                                           | 0/12 (0)                                          |
| <b>Intracranial distal ICA</b> | <b>NR</b>          | 23/23 (100)                       | 0/23 (0)                        | 0/23 (0)                                           | 0/23 (0)                                          |
| <b>MCA major branch</b>        | <b>NR</b>          | 17/19 (89.5)                      | 0/19 (0)                        | 1/19 (5.3)                                         | 1/19 (5.3)                                        |
| <b>Posterior circulation</b>   | <b>NR</b>          | 3/4 (75)                          | 1/4 (25)                        | 0/4 (0)                                            | 0/4 (0)                                           |
| <b>ACA major branch</b>        | <b>NS</b>          | 3/5 (60)                          | 1/5 (20)                        | 0/5 (0)                                            | 1/5 (20)                                          |
| <b>Around-dural ring</b>       | <b>NS</b>          | 98/106 (92.5)                     | 1/106 (0.9)                     | 1/106 (0.9)                                        | 6/106 (5.7)                                       |
| <b>Extra-dural ring</b>        | <b>NS</b>          | 10/12 (83.3)                      | 1/12 (8.3)                      | 0/12 (0)                                           | 1/12 (8.3)                                        |

|                                |                    |               |             |             |             |
|--------------------------------|--------------------|---------------|-------------|-------------|-------------|
| <b>Intracranial distal ICA</b> | NS                 | 21/23 (91.3)  | 0/23 (0)    | 2/23 (8.7)  | 0/23 (0)    |
| <b>MCA major branch</b>        | NS                 | 18/19 (94.7)  | 0/19 (0)    | 0/19 (0)    | 1/19 (5.3)  |
| <b>Posterior circulation</b>   | NS                 | 3/4 (75)      | 0/4 (0)     | 0/4 (0)     | 1/4 (25)    |
| <b>ACA major branch</b>        | <b>Radiologist</b> | 3/5 (60)      | 0/5 (0)     | 0/5 (0)     | 2/5 (40)    |
| <b>Around-dural ring</b>       | <b>Radiologist</b> | 98/106 (92.5) | 1/106 (0.9) | 1/106 (0.9) | 6/106 (5.7) |
| <b>Extra-dural ring</b>        | <b>Radiologist</b> | 10/12 (83.3)  | 0/12 (0)    | 0/12 (0)    | 2/12 (16.7) |
| <b>Intracranial distal ICA</b> | <b>Radiologist</b> | 19/23 (82.6)  | 0/23 (0)    | 4/23 (17.4) | 0/23 (0)    |
| <b>MCA major branch</b>        | <b>Radiologist</b> | 17/19 (89.5)  | 0/19 (0)    | 1/19 (5.3)  | 1/19 (5.3)  |
| <b>Posterior circulation</b>   | <b>Radiologist</b> | 3/4 (75)      | 1/4 (25)    | 0/4 (0)     | 0/4 (0)     |
| <b>ACA major branch</b>        | <b>Resident</b>    | 2/5 (40)      | 2/5 (40)    | 1/5 (20)    | 0/5 (0)     |
| <b>Around-dural ring</b>       | <b>Resident</b>    | 99/106 (93.4) | 1/106 (0.9) | 0/106 (0)   | 6/106 (5.7) |
| <b>Extra-dural ring</b>        | <b>Resident</b>    | 10/12 (83.3)  | 0/12 (0)    | 0/12 (0)    | 2/12 (16.7) |
| <b>Intracranial distal ICA</b> | <b>Resident</b>    | 22/23 (95.7)  | 0/23 (0)    | 1/23 (4.3)  | 0/23 (0)    |
| <b>MCA major branch</b>        | <b>Resident</b>    | 17/19 (89.5)  | 0/19 (0)    | 1/19 (5.3)  | 1/19 (5.3)  |
| <b>Posterior circulation</b>   | <b>Resident</b>    | 3/4 (75)      | 0/4 (0)     | 0/4 (0)     | 1/4 (25)    |

NR, neurologist; NS, neurosurgeon; ACA, anterior cerebral artery; ICA, internal carotid artery; MCA, middle cerebral artery



**Supplemental Figure 1.**

CAD software presented a 1.0 cm × 1.0 cm bounding box, which was expected to contain an aneurysm on final images.

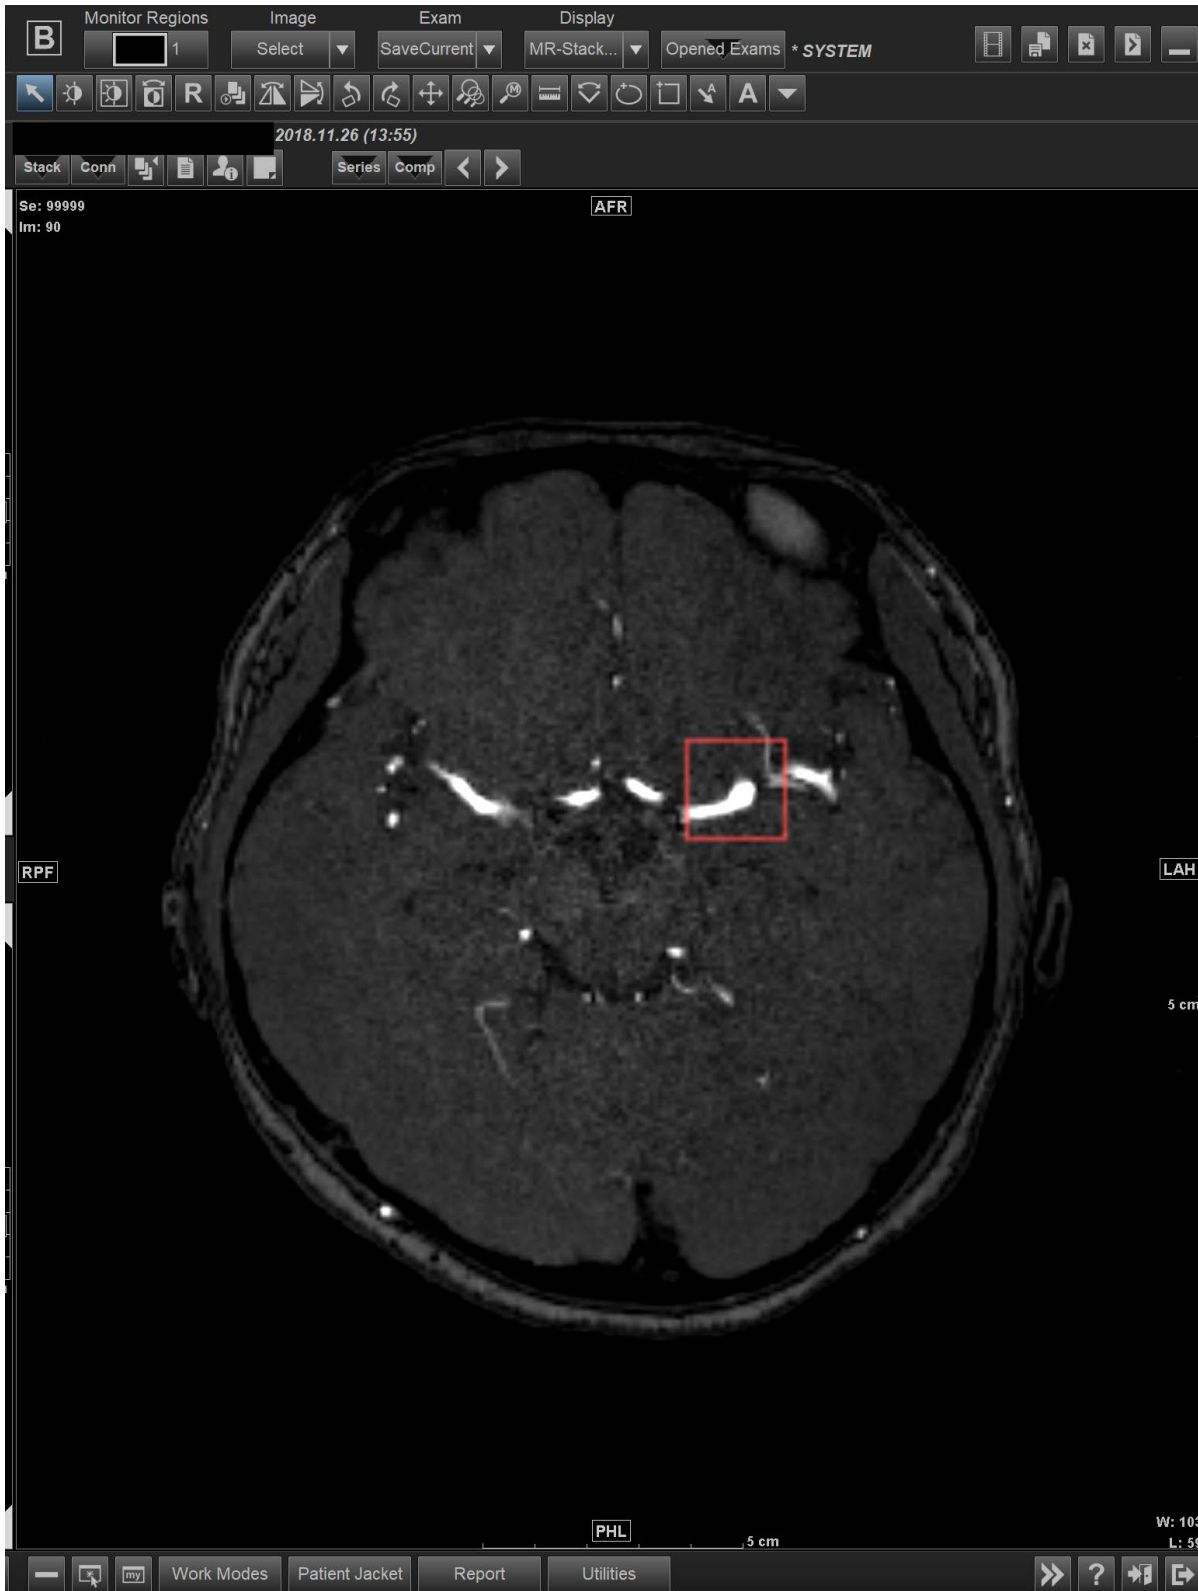

Supplement: 0014.pdf [file 0014.pdf]
